# Supplementary material for: Experimental validation of a computationally-designed tiotropium membrane sensor
Source: Royal Society of Chemistry journal article supplement (doi:10.1039/c8nj03507e), 2018-01-01
Supplement: c8nj03507e1.pdf [file c8nj03507e1.pdf]

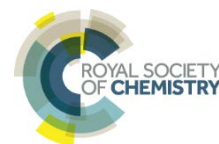

## New Journal of Chemistry

### Experimental validation of a computationally-designed tiotropium membrane sensor

Ali M. Yehia<sup>\*a</sup>, Soad E. Abo-Elhoda<sup>b</sup>, Nagiba Y. Hassan<sup>a</sup>, Amr M. Badawey<sup>ab</sup>

<sup>a</sup>Analytical Chemistry Department, Faculty of Pharmacy, Cairo University, El-Kasr El-Aini Street, 11562, Cairo, Egypt.

<sup>b</sup>Pharmaceutical Chemistry Department, Faculty of Pharmaceutical Sciences & Pharmaceutical Industries, Future University, Cairo, Egypt.

**Table (1S)** Factors and its corresponding levels for quantitative optimisation of membrane sensor and the measure response of randomly ordered experiments.

| Experiment No. <sup>a</sup> | Contentious factors           |                              |                                | Response                                    |
|-----------------------------|-------------------------------|------------------------------|--------------------------------|---------------------------------------------|
|                             | Ion exchanger                 | Ionophore                    | NPOE/PVC ratio                 | Detection limit                             |
|                             | TFPB (mmol Kg <sup>-1</sup> ) | CX8 (mmol Kg <sup>-1</sup> ) | (Total weigh, mg) <sup>b</sup> | (Log[C], mol L <sup>-1</sup> ) <sup>c</sup> |
| 5                           | 4.5                           | 5                            | 1.0 (595)                      | -6.60                                       |
| 9                           | 4.0                           | 10                           | 2.0(593)                       | -6.85                                       |
| 10                          | 4.0                           | 15                           | 1.5(590)                       | -6.49                                       |
| 3                           | 5.0                           | 15                           | 1.0 (590)                      | -6.57                                       |
| 2                           | 5.0                           | 5                            | 1.5(595)                       | -6.67                                       |
| 7                           | 4.0                           | 10                           | 1.0 (593)                      | -6.75                                       |
| 1                           | 4.0                           | 5                            | 2.0 (595)                      | -6.55                                       |
| 4                           | 4.5                           | 10                           | 2.0 (593)                      | -6.85                                       |
| 11                          | 5.0                           | 10                           | 1.5 (592)                      | -6.80                                       |
| 6                           | 5.0                           | 15                           | 2.0 (590)                      | -6.57                                       |
| 8                           | 4.5                           | 15                           | 1.5 (590)                      | -6.52                                       |

<sup>a</sup>Experiments are arranged in random order of execution

<sup>b</sup> values in parentheses are the total weight of NPOE and PVC in milligrams for each experiment.

<sup>c</sup> Detection limits were estimated for each sensor at the point where this linear segment of calibration plot intersects with the extrapolated arm of background potential
